# Supplementary material for: Effects of Uremic Clearance Granules in Uremic Pruritus: A Meta-Analysis
Source: MDPI journal article supplement (doi:10.3390/toxins13100702), 2021-10-04
Supplement: s1 [file s1]

# Supplementary Materials: Effects of Uremic Clearance Granules in Uremic Pruritus: A Meta-Analysis

Ping-Hsun Lu, Jen-Yu Wang, Hui-En Chuo and Po-Hsuan Lu

**Table S1.** Characteristics of Selected Studies with inspection data.

| Study (year)                   | Ca                               | P                                | PTH                                    | Scr                                      | BUN                                | UA                                    | TNF- $\alpha$ | IL-6 | FGF23                                  | B2-MG                | hs-CRP                             | Alb | Hb | Overall Effectiveness | ADR |
|--------------------------------|----------------------------------|----------------------------------|----------------------------------------|------------------------------------------|------------------------------------|---------------------------------------|---------------|------|----------------------------------------|----------------------|------------------------------------|-----|----|-----------------------|-----|
| Kao et al. 2011 <sup>55</sup>  | --                               | --                               | --                                     | --                                       | --                                 | --                                    | --            | --   | --                                     | --                   | --                                 | --  | -- | U: 14/16<br>C: 11/16  | --  |
|                                | U:<br>2.09(0.24) →<br>2.30(0.21) | U:<br>2.31(0.48) →<br>1.85(0.41) | U:<br>562.11(74.42) →<br>462.46(72.48) | U:<br>928.25(159.37) →<br>750.25(143.25) | U:<br>26.26(4.47) →<br>19.47(4.22) | U:<br>527.01(15.7) →<br>510.73(15.32) | --            | --   | U:<br>777.7(120.88) →<br>681.3(115.78) | --                   | U:<br>13.95(1.02) →<br>12.02(0.92) | --  | -- | U: 11/21<br>C: -      | --  |
| Yang et al. 2016 <sup>53</sup> | C:<br>2.09(0.25) →<br>2.10(0.24) | C:<br>2.17(0.69) →<br>2.23(0.66) | C:<br>574.22(73.45) →<br>545.25(77.90) | C:<br>930.33(165.26) →<br>915.97(146.60) | C:<br>26.34(4.67) →<br>24.85(4.13) | C:<br>532.23(16.9) →<br>534.18(15.56) | --            | --   | C:<br>779.1(127.4) →<br>797.3(138.36)  | --                   | C:<br>14.05(1.11) →<br>14.22(1.31) | --  | -- |                       |     |
| Yu et al. 2017 <sup>54</sup>   | U:<br>2.29(0.18) →               | U:<br>2.34(0.52) →               | U:<br>432.35(79.16) →                  | --                                       | --                                 | --                                    | --            | --   | --                                     | U:<br>48.57(12.21) → | U:<br>12.73(3.19) →                | --  | -- | U: 49/65<br>C: 36/63  | --  |

[www.mdpi.com/journal/toxins](http://www.mdpi.com/journal/toxins)

[www.mdpi.com/journal/toxins](http://www.mdpi.com/journal/toxins)

[www.mdpi.com/journal/toxins](http://www.mdpi.com/journal/toxins)

---

ADR = adverse drug reaction; Alb = albumin; BUN = blood urea nitrogen; C = control; Ca = calcium; FGF23 = fibroblast growth factor 23; Hb = hemoglobin; hs-CRP = high-sensitivity C-reactive protein; IL-6 = interleukin-6; iPTH = intact parathyroid hormone; P = phosphorus; Scr = serum creatinine; TNF- $\alpha$  = tumor necrosis factor- $\alpha$ ; U = uremic clearance granule; UA = uric acid;  $\beta$ 2-MG =  $\beta$ 2-microglobulin

**Table S2.** Grade profile summary of ‘UCG for UP’ quality assessment.**Primary outcomes**

| Certainty assessment |              |              |               |              |             |                      | № of patients |         | Effect            |                   | Certainty | Importance |
|----------------------|--------------|--------------|---------------|--------------|-------------|----------------------|---------------|---------|-------------------|-------------------|-----------|------------|
| № of studies         | Study design | Risk of bias | Inconsistency | Indirectness | Imprecision | Other considerations | UCG           | placebo | Relative (95% CI) | Absolute (95% CI) |           |            |

**Visual analog scale**

|   |                   |         |             |             |             |                                     |     |     |   |                                                    |             |           |
|---|-------------------|---------|-------------|-------------|-------------|-------------------------------------|-----|-----|---|----------------------------------------------------|-------------|-----------|
| 5 | randomised trials | serious | not serious | not serious | not serious | publication bias strongly suspected | 248 | 244 | - | MD <b>2.02 lower</b><br>(2.17 lower to 1.88 lower) | ⊕⊕○○<br>LOW | IMPORTANT |
|---|-------------------|---------|-------------|-------------|-------------|-------------------------------------|-----|-----|---|----------------------------------------------------|-------------|-----------|

**Overall effectiveness**

|   |                   |         |             |             |             |                                     |                 |                 |                                  |                                                          |             |           |
|---|-------------------|---------|-------------|-------------|-------------|-------------------------------------|-----------------|-----------------|----------------------------------|----------------------------------------------------------|-------------|-----------|
| 9 | randomised trials | serious | not serious | not serious | not serious | publication bias strongly suspected | 324/374 (86.6%) | 251/370 (67.8%) | <b>OR 3.16</b><br>(2.14 to 4.67) | <b>191 more per 1,000</b><br>(from 140 more to 229 more) | ⊕⊕○○<br>LOW | IMPORTANT |
|---|-------------------|---------|-------------|-------------|-------------|-------------------------------------|-----------------|-----------------|----------------------------------|----------------------------------------------------------|-------------|-----------|

## Secondary outcomes

| Certainty assessment |              |              |               |              |             |                      | № of patients |         | Effect            |                   | Certainty | Importance |
|----------------------|--------------|--------------|---------------|--------------|-------------|----------------------|---------------|---------|-------------------|-------------------|-----------|------------|
| № of studies         | Study design | Risk of bias | Inconsistency | Indirectness | Imprecision | Other considerations | UCG           | placebo | Relative (95% CI) | Absolute (95% CI) |           |            |

## Calcium

|   |                   |             |              |             |         |                                     |     |     |   |                                                      |                  |           |
|---|-------------------|-------------|--------------|-------------|---------|-------------------------------------|-----|-----|---|------------------------------------------------------|------------------|-----------|
| 6 | randomised trials | not serious | very serious | not serious | serious | publication bias strongly suspected | 258 | 254 | - | MD <b>0.08 higher</b><br>(0.26 lower to 0.43 higher) | ⊕○○○<br>VERY LOW | IMPORTANT |
|---|-------------------|-------------|--------------|-------------|---------|-------------------------------------|-----|-----|---|------------------------------------------------------|------------------|-----------|

## Phosphorus

|   |                   |             |         |             |             |                                     |     |     |   |                                                    |             |           |
|---|-------------------|-------------|---------|-------------|-------------|-------------------------------------|-----|-----|---|----------------------------------------------------|-------------|-----------|
| 7 | randomised trials | not serious | serious | not serious | not serious | publication bias strongly suspected | 316 | 312 | - | MD <b>0.32 lower</b><br>(0.41 lower to 0.24 lower) | ⊕⊕○○<br>LOW | IMPORTANT |
|---|-------------------|-------------|---------|-------------|-------------|-------------------------------------|-----|-----|---|----------------------------------------------------|-------------|-----------|

PTH

| Certainty assessment |                   |              |               |              |             |                                     | № of patients |         | Effect            |                                                     | Certainty        | Importance |
|----------------------|-------------------|--------------|---------------|--------------|-------------|-------------------------------------|---------------|---------|-------------------|-----------------------------------------------------|------------------|------------|
| № of studies         | Study design      | Risk of bias | Inconsistency | Indirectness | Imprecision | Other considerations                | UCG           | placebo | Relative (95% CI) | Absolute (95% CI)                                   |                  |            |
| 5                    | randomised trials | not serious  | very serious  | not serious  | not serious | publication bias strongly suspected | 226           | 222     | -                 | MD <b>93.03 lower</b> (141.91 lower to 44.14 lower) | ⊕○○○<br>VERY LOW | IMPORTANT  |

**iPTH**

|   |                   |             |         |             |             |                                     |    |    |   |                                                     |             |           |
|---|-------------------|-------------|---------|-------------|-------------|-------------------------------------|----|----|---|-----------------------------------------------------|-------------|-----------|
| 2 | randomised trials | not serious | serious | not serious | not serious | publication bias strongly suspected | 90 | 90 | - | MD <b>89.51 lower</b> (123.95 lower to 55.07 lower) | ⊕⊕○○<br>LOW | IMPORTANT |
|---|-------------------|-------------|---------|-------------|-------------|-------------------------------------|----|----|---|-----------------------------------------------------|-------------|-----------|

**hs-CRP**

|   |                   |             |              |             |             |                                     |     |     |   |                                                 |                  |           |
|---|-------------------|-------------|--------------|-------------|-------------|-------------------------------------|-----|-----|---|-------------------------------------------------|------------------|-----------|
| 6 | randomised trials | not serious | very serious | not serious | not serious | publication bias strongly suspected | 309 | 305 | - | MD <b>2.07 lower</b> (2.89 lower to 1.25 lower) | ⊕○○○<br>VERY LOW | IMPORTANT |
|---|-------------------|-------------|--------------|-------------|-------------|-------------------------------------|-----|-----|---|-------------------------------------------------|------------------|-----------|



**TNF- $\alpha$** 

|   |                   |             |             |             |             |                                     |    |    |   |                                                    |                  |           |
|---|-------------------|-------------|-------------|-------------|-------------|-------------------------------------|----|----|---|----------------------------------------------------|------------------|-----------|
| 2 | randomised trials | not serious | not serious | not serious | not serious | publication bias strongly suspected | 94 | 94 | - | MD <b>15.23 lower</b><br>(20 lower to 10.47 lower) | ⊕⊕⊕○<br>MODERATE | IMPORTANT |
|---|-------------------|-------------|-------------|-------------|-------------|-------------------------------------|----|----|---|----------------------------------------------------|------------------|-----------|

**IL-6**

|   |                   |             |             |             |             |                                     |    |    |   |                                                    |                  |           |
|---|-------------------|-------------|-------------|-------------|-------------|-------------------------------------|----|----|---|----------------------------------------------------|------------------|-----------|
| 2 | randomised trials | not serious | not serious | not serious | not serious | publication bias strongly suspected | 94 | 94 | - | MD <b>6.13 lower</b><br>(7.42 lower to 4.84 lower) | ⊕⊕⊕○<br>MODERATE | IMPORTANT |
|---|-------------------|-------------|-------------|-------------|-------------|-------------------------------------|----|----|---|----------------------------------------------------|------------------|-----------|

**SCr**

|   |                   |             |              |             |             |                                     |     |     |   |                                                         |                  |           |
|---|-------------------|-------------|--------------|-------------|-------------|-------------------------------------|-----|-----|---|---------------------------------------------------------|------------------|-----------|
| 4 | randomised trials | not serious | very serious | not serious | not serious | publication bias strongly suspected | 165 | 165 | - | MD <b>128.38 lower</b><br>(214.34 lower to 42.42 lower) | ⊕○○○<br>VERY LOW | IMPORTANT |
|---|-------------------|-------------|--------------|-------------|-------------|-------------------------------------|-----|-----|---|---------------------------------------------------------|------------------|-----------|

**BUN**

|   |                   |             |             |             |             |                                     |     |     |   |                                                    |                  |           |
|---|-------------------|-------------|-------------|-------------|-------------|-------------------------------------|-----|-----|---|----------------------------------------------------|------------------|-----------|
| 4 | randomised trials | not serious | not serious | not serious | not serious | publication bias strongly suspected | 165 | 165 | - | MD <b>5.23 lower</b><br>(5.87 lower to 4.58 lower) | ⊕⊕⊕○<br>MODERATE | IMPORTANT |
|---|-------------------|-------------|-------------|-------------|-------------|-------------------------------------|-----|-----|---|----------------------------------------------------|------------------|-----------|

## UA

|   |                   |             |              |             |         |                                     |     |     |   |                                                        |                  |           |
|---|-------------------|-------------|--------------|-------------|---------|-------------------------------------|-----|-----|---|--------------------------------------------------------|------------------|-----------|
| 3 | randomised trials | not serious | very serious | not serious | serious | publication bias strongly suspected | 115 | 115 | - | MD <b>16.94 lower</b><br>(63.56 lower to 29.67 higher) | ⊕○○○<br>VERY LOW | IMPORTANT |
|---|-------------------|-------------|--------------|-------------|---------|-------------------------------------|-----|-----|---|--------------------------------------------------------|------------------|-----------|

BUN: blood urea nitrogen; CI: Confidence interval; hs-CRP: high sensitivity C- reactive protein; IL-6: interleukin 6; iPTH: parathyroid hormone intact; MD: Mean difference; OR: Odds ratio; PTH: parathyroid hormone; Scr: serum creatinine; TNF- $\alpha$ : tumor necrosis factor-alpha; UA: uric acid;  $\beta$ 2-MG: beta 2-Microglobulin

Table S3. Search\_History.

## Pubmed

| No. | Query                                                                                                                                                                                                                                                                                                                                                                                                                                                                                                                                                                                                                                                                                                                                                                                                                                                                                                                                           | Results | Date      |
|-----|-------------------------------------------------------------------------------------------------------------------------------------------------------------------------------------------------------------------------------------------------------------------------------------------------------------------------------------------------------------------------------------------------------------------------------------------------------------------------------------------------------------------------------------------------------------------------------------------------------------------------------------------------------------------------------------------------------------------------------------------------------------------------------------------------------------------------------------------------------------------------------------------------------------------------------------------------|---------|-----------|
| #6  | #3 AND #4 AND #5                                                                                                                                                                                                                                                                                                                                                                                                                                                                                                                                                                                                                                                                                                                                                                                                                                                                                                                                | 68      | 19-Jul-21 |
| #5  | 'uremic clearance' OR (uremic AND ('clearance'/exp OR clearance)) OR 'uremic clearance granule' OR (uremic AND ('clearance'/exp OR clearance) AND ('granule'/exp OR granule)) OR niaoduqing OR 'niaoduqing particles' OR (niaoduqing AND particles) OR 'niaoduqing keli' OR (niaoduqing AND keli)                                                                                                                                                                                                                                                                                                                                                                                                                                                                                                                                                                                                                                               | 1842    | 19-Jul-21 |
| #4  | 'pruritus'/exp OR pruritus OR 'pruritis'/exp OR pruritis OR itch* OR 'xerosis'/exp OR xerosis OR 'skin problems' OR (('skin'/exp OR skin) AND problems) OR 'skin disorders' OR (('skin'/exp OR skin) AND ('disorders'/exp OR disorders))                                                                                                                                                                                                                                                                                                                                                                                                                                                                                                                                                                                                                                                                                                        | 1189856 | 19-Jul-21 |
| #3  | #1 OR #2                                                                                                                                                                                                                                                                                                                                                                                                                                                                                                                                                                                                                                                                                                                                                                                                                                                                                                                                        | 875885  | 19-Jul-21 |
| #2  | uremic OR 'uremia'/exp OR uremia OR uremias                                                                                                                                                                                                                                                                                                                                                                                                                                                                                                                                                                                                                                                                                                                                                                                                                                                                                                     | 56328   | 19-Jul-21 |
| #1  | 'chronic kidney disease'/exp OR 'chronic kidney disease' OR (chronic AND ('kidney'/exp OR kidney) AND ('disease'/exp OR disease)) OR 'kidney injury'/exp OR 'kidney injury' OR (('kidney'/exp OR kidney) AND ('injury'/exp OR injury)) OR 'kidney failure'/exp OR 'kidney failure' OR (('kidney'/exp OR kidney) AND ('failure'/exp OR failure)) OR 'chronic renal failure'/exp OR 'chronic renal failure' OR (chronic AND ('renal'/exp OR renal) AND ('failure'/exp OR failure)) OR 'end-stage renal disease'/exp OR 'end-stage renal disease' OR ('end stage' AND ('renal'/exp OR renal) AND ('disease'/exp OR disease)) OR 'end stage renal disease'/exp OR 'end stage renal disease' OR (end AND stage AND ('renal'/exp OR renal) AND ('disease'/exp OR disease)) OR 'dialysis'/exp OR dialysis OR 'hemodialysis'/exp OR hemodialysis OR 'peritoneal dialysis'/exp OR 'peritoneal dialysis' OR (peritoneal AND ('dialysis'/exp OR dialysis)) | 865941  | 19-Jul-21 |

## Cochrane Library

| ID | Search | Hits |
|----|--------|------|
|----|--------|------|

|    |                                                                                                                                                                                             |                                                                                                                                                                             |
|----|---------------------------------------------------------------------------------------------------------------------------------------------------------------------------------------------|-----------------------------------------------------------------------------------------------------------------------------------------------------------------------------|
| #1 | chronic kidney disease OR kidney injury OR kidney failure OR chronic renal failure OR end-stage renal disease OR end stage renal disease OR dialysis OR hemodialysis OR peritoneal dialysis | 45967                                                                                                                                                                       |
| #2 | uremic OR Uremia OR uremias                                                                                                                                                                 | 2081                                                                                                                                                                        |
| #3 | #1 OR #2                                                                                                                                                                                    | 46362                                                                                                                                                                       |
| #4 | Pruritus OR Pruritis OR itch* OR xerosis OR skin problems OR skin disorders                                                                                                                 | 23466                                                                                                                                                                       |
| #5 | uremic clearance OR uremic clearance granule OR Niaoduqing OR Niaoduqing Particles OR Niaoduqing KeLi                                                                                       | 194                                                                                                                                                                         |
| #6 | #3 AND #4 AND #5                                                                                                                                                                            | 11                                                                                                                                                                          |
|    |                                                                                                                                                                                             |                                                                                                                                                                             |
|    | 其中有一篇歸屬於 Special collection 的 "Neglected tropical diseases: the top five"無法匯出至 EndNote                                                                                                      | <a href="https://www.cochranelibrary.com/collections/doi/10.1002/14651858.SC000021/full">https://www.cochranelibrary.com/collections/doi/10.1002/14651858.SC000021/full</a> |

## Embase

| No. | Query                                                                                                                                                                                                                                                                                             | Results | Date      |
|-----|---------------------------------------------------------------------------------------------------------------------------------------------------------------------------------------------------------------------------------------------------------------------------------------------------|---------|-----------|
| #6  | #3 AND #4 AND #5                                                                                                                                                                                                                                                                                  | 68      | 19-Jul-21 |
| #5  | 'uremic clearance' OR (uremic AND ('clearance'/exp OR clearance)) OR 'uremic clearance granule' OR (uremic AND ('clearance'/exp OR clearance) AND ('granule'/exp OR granule)) OR niaoduqing OR 'niaoduqing particles' OR (niaoduqing AND particles) OR 'niaoduqing keli' OR (niaoduqing AND keli) | 1842    | 19-Jul-21 |
| #4  | 'pruritus'/exp OR pruritus OR 'pruritis'/exp OR pruritis OR itch* OR 'xerosis'/exp OR xerosis OR 'skin problems' OR (('skin'/exp OR skin) AND problems) OR 'skin disorders' OR (('skin'/exp OR skin) AND ('disorders'/exp OR disorders))                                                          | 1189856 | 19-Jul-21 |
| #3  | #1 OR #2                                                                                                                                                                                                                                                                                          | 875885  | 19-Jul-21 |

|    |                                                                                                                                                                                                                                                                                                                                                                                                                                                                                                                                                                                                                                                                                                                                                                                                                                                                                                                                                 |        |           |
|----|-------------------------------------------------------------------------------------------------------------------------------------------------------------------------------------------------------------------------------------------------------------------------------------------------------------------------------------------------------------------------------------------------------------------------------------------------------------------------------------------------------------------------------------------------------------------------------------------------------------------------------------------------------------------------------------------------------------------------------------------------------------------------------------------------------------------------------------------------------------------------------------------------------------------------------------------------|--------|-----------|
| #2 | uremic OR 'uremia'/exp OR uremia OR uremias                                                                                                                                                                                                                                                                                                                                                                                                                                                                                                                                                                                                                                                                                                                                                                                                                                                                                                     | 56328  | 19-Jul-21 |
| #1 | 'chronic kidney disease'/exp OR 'chronic kidney disease' OR (chronic AND ('kidney'/exp OR kidney) AND ('disease'/exp OR disease)) OR 'kidney injury'/exp OR 'kidney injury' OR (('kidney'/exp OR kidney) AND ('injury'/exp OR injury)) OR 'kidney failure'/exp OR 'kidney failure' OR (('kidney'/exp OR kidney) AND ('failure'/exp OR failure)) OR 'chronic renal failure'/exp OR 'chronic renal failure' OR (chronic AND ('renal'/exp OR renal) AND ('failure'/exp OR failure)) OR 'end-stage renal disease'/exp OR 'end-stage renal disease' OR ('end stage' AND ('renal'/exp OR renal) AND ('disease'/exp OR disease)) OR 'end stage renal disease'/exp OR 'end stage renal disease' OR (end AND stage AND ('renal'/exp OR renal) AND ('disease'/exp OR disease)) OR 'dialysis'/exp OR dialysis OR 'hemodialysis'/exp OR hemodialysis OR 'peritoneal dialysis'/exp OR 'peritoneal dialysis' OR (peritoneal AND ('dialysis'/exp OR dialysis)) | 865941 | 19-Jul-21 |

## CINAHL

| #  | 查詢                                                                                                               | 設限值/擴增詞         | 上次執行透過                            | 結果     |
|----|------------------------------------------------------------------------------------------------------------------|-----------------|-----------------------------------|--------|
| S6 | S3 AND S4 AND S5                                                                                                 | 擴增詞 - 套用相等主題    | 介面 - EBSCOhost Research Databases | 2      |
|    |                                                                                                                  | 檢索模式 - 尋找全部檢索詞語 | 檢索畫面 - 進階檢索                       |        |
|    |                                                                                                                  |                 | 資料庫 - CINAHL                      |        |
| S5 | uremic clearance OR uremic clearance granule OR Niaoduqing OR Niaoduqing Particles OR Niaoduqing KeLi            | 擴增詞 - 套用相等主題    | 介面 - EBSCOhost Research Databases | 94     |
|    |                                                                                                                  | 檢索模式 - 尋找全部檢索詞語 | 檢索畫面 - 進階檢索                       |        |
|    |                                                                                                                  |                 | 資料庫 - CINAHL                      |        |
| S4 | Pruritus OR Pruritis OR itch* OR xerosis OR skin problems OR skin disorders                                      | 擴增詞 - 套用相等主題    | 介面 - EBSCOhost Research Databases | 27,313 |
|    |                                                                                                                  | 檢索模式 - 尋找全部檢索詞語 | 檢索畫面 - 進階檢索                       |        |
|    |                                                                                                                  |                 | 資料庫 - CINAHL                      |        |
| S3 | S1 OR S2                                                                                                         | 擴增詞 - 套用相等主題    | 介面 - EBSCOhost Research Databases | 91,429 |
|    |                                                                                                                  | 檢索模式 - 尋找全部檢索詞語 | 檢索畫面 - 進階檢索                       |        |
|    |                                                                                                                  |                 | 資料庫 - CINAHL                      |        |
| S2 | uremic OR Uremia OR uremias                                                                                      | 擴增詞 - 套用相等主題    | 介面 - EBSCOhost Research Databases | 4,043  |
|    |                                                                                                                  | 檢索模式 - 尋找全部檢索詞語 | 檢索畫面 - 進階檢索                       |        |
|    |                                                                                                                  |                 | 資料庫 - CINAHL                      |        |
| S1 | chronic kidney disease OR kidney injury OR kidney failure OR chronic renal failure OR end-stage renal disease OR | 擴增詞 - 套用相等主題    | 介面 - EBSCOhost Research Databases | 89,747 |
|    |                                                                                                                  | 檢索模式 - 尋找全部檢索詞語 | 檢索畫面 - 進階檢索                       |        |

|  |                                                                            |  |              |  |
|--|----------------------------------------------------------------------------|--|--------------|--|
|  | end stage renal disease OR dialysis OR hemodialysis OR peritoneal dialysis |  | 資料庫 - CINAHL |  |
|--|----------------------------------------------------------------------------|--|--------------|--|

ClinicalTrials.gov

|                      |                                                                               |
|----------------------|-------------------------------------------------------------------------------|
| Condition or disease | uremic OR Uremia OR Uremias OR Atypical Hemolytic Uremic Syndrome OR pruritus |
| <b>Other terms</b>   | uremic clearance OR Niaoduqing OR Niaoduqing KeLi                             |
|                      |                                                                               |
| 搜尋結果為 17 篇           |                                                                               |

Airiti Library

|                                                                                                                                                                                                                                                                                                                                                            |           |
|------------------------------------------------------------------------------------------------------------------------------------------------------------------------------------------------------------------------------------------------------------------------------------------------------------------------------------------------------------|-----------|
| chronic kidney disease OR kidney failure OR dialysis OR 透析 OR 血透 OR 腹透 OR 腎衰竭 OR 腎功能衰竭 OR 腎功能不全 OR 腎小球腎炎 OR 腎炎 OR uremic OR Uremia OR uremias OR 尿毒                                                                                                                                                                                                        | 篇名.關鍵字.摘要 |
| pruritus OR Pruritis OR itch* OR xerosis OR Skin Diseases OR 皮膚搔癢 OR 搔癢 OR 癢                                                                                                                                                                                                                                                                               | 篇名.關鍵字.摘要 |
| uremic clearance OR Niaoduqing OR Niaoduqing KeLi OR 尿毒清顆粒 OR 尿毒清                                                                                                                                                                                                                                                                                          | 篇名.關鍵字.摘要 |
|                                                                                                                                                                                                                                                                                                                                                            |           |
| 三項以 AND 串連共搜尋到 8 篇文獻                                                                                                                                                                                                                                                                                                                                       |           |
| 搜尋指令為以下                                                                                                                                                                                                                                                                                                                                                    |           |
| ((chronic kidney disease OR kidney failure OR dialysis OR 透析 OR 血透 OR 腹透 OR 腎衰竭 OR 腎功能衰竭 OR 腎功能不全 OR 腎小球腎炎 OR 腎炎 OR uremic OR Uremia OR uremias OR 尿毒)) = 篇名.關鍵字.摘要 AND ((pruritus OR Pruritis OR itch* OR xerosis OR Skin Diseases OR 皮膚搔癢 OR 搔癢 OR 癢)) = 篇名.關鍵字.摘要 AND ((uremic clearance OR Niaoduqing OR Niaoduqing KeLi OR 尿毒清顆粒 OR 尿毒清)) = 篇名.關鍵字.摘要 |           |

## Wanfang databases

|                                                                                                                                                                                                                                                                                           |    |
|-------------------------------------------------------------------------------------------------------------------------------------------------------------------------------------------------------------------------------------------------------------------------------------------|----|
| chronic kidney disease OR kidney injury OR kidney failure OR chronic renal failure OR chronic kidney disease OR end-stage renal disease OR dialysis OR hemodialysis OR peritoneal dialysis OR 透析 OR 血透 OR 腹透 OR 腎衰竭 OR 腎功能衰竭 OR 腎功能不全 OR 腎小球腎炎 OR 腎炎 OR uremic OR Uremia OR uremias OR 尿毒 | 全部 |
| pruritus OR pruritus OR Pruritis OR itch OR xerosis OR skin problems OR skin disorders OR 皮膚搔癢 OR 搔癢 OR 癢                                                                                                                                                                                 | 全部 |
| uremic clearance OR uremic clearance granule OR Niaoduqing OR Niaoduqing Particles OR Niaoduqing KeLi OR 尿毒清顆粒 OR 尿毒清                                                                                                                                                                     | 全部 |
| 三項以 AND 串連共搜尋到 82 篇文獻                                                                                                                                                                                                                                                                     |    |

## Chinese National Knowledge Infrastructure

|    |                       |     |
|----|-----------------------|-----|
| #1 | 尿毒清                   | 篇關摘 |
| #2 | 皮膚瘙癢                  | 篇關摘 |
|    | 二項以 AND 串連共搜尋到 18 篇文獻 |     |
